# Supplementary material for: Biodegradable cross-linked poly(amino alcoholesters) based on LMW PEI for gene delivery
Source: Royal Society of Chemistry journal article supplement (doi:10.1039/c0mb00339e), 2011-02-02
Supplement: c0mb00339e.pdf [file c0mb00339e.pdf]

## Supplementary information:

# Biodegradable cross-linked poly(amino alcohol esters) based on LMW PEI for gene delivery

*Shuo Li, Yu Wang, Ji Zhang<sup>\*</sup>, Wei-Han Yang, Zhen-Hua Dai, Wen Zhu<sup>\*</sup>, and Xiao-Qi Yu<sup>\*</sup>*

|                                              |     |
|----------------------------------------------|-----|
| Characterization of compound <b>2a</b> ..... | S1  |
| Characterization of compound <b>2b</b> ..... | S3  |
| Characterization of compound <b>2c</b> ..... | S5  |
| Characterization of DA-PEI <b>3a</b> .....   | S7  |
| Characterization of DS-PEI <b>3b</b> .....   | S8  |
| Characterization of DO-PEI <b>3c</b> .....   | S9  |
| GPC sheets.....                              | S10 |

<sup>1</sup>H NMR spectrum of **2a**

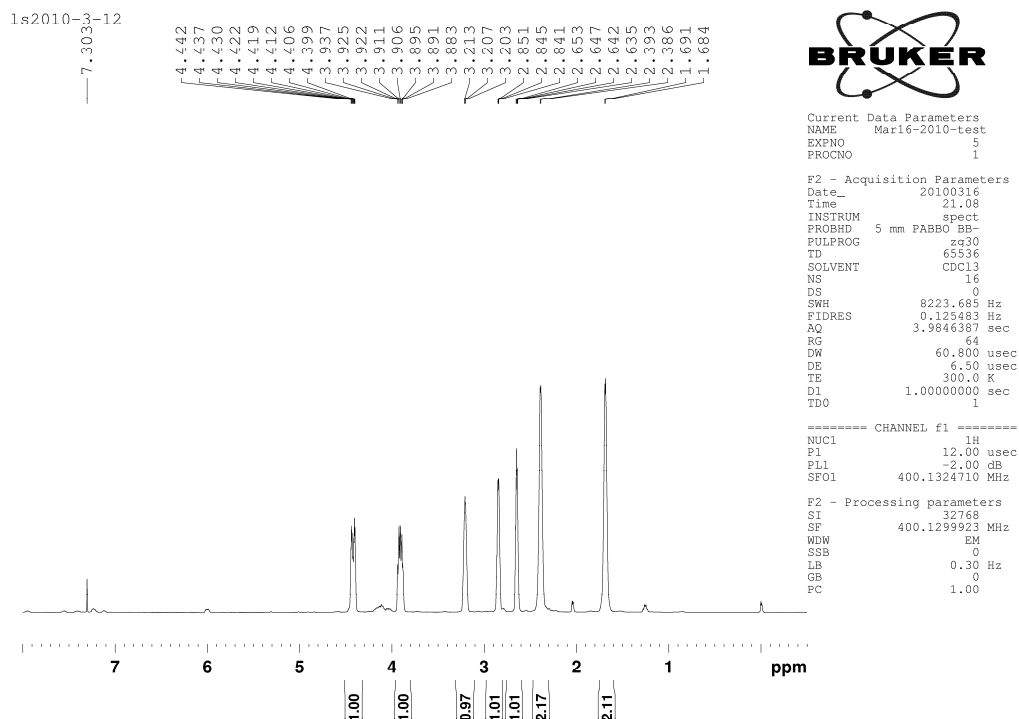

<sup>13</sup>C NMR spectrum of **2a**

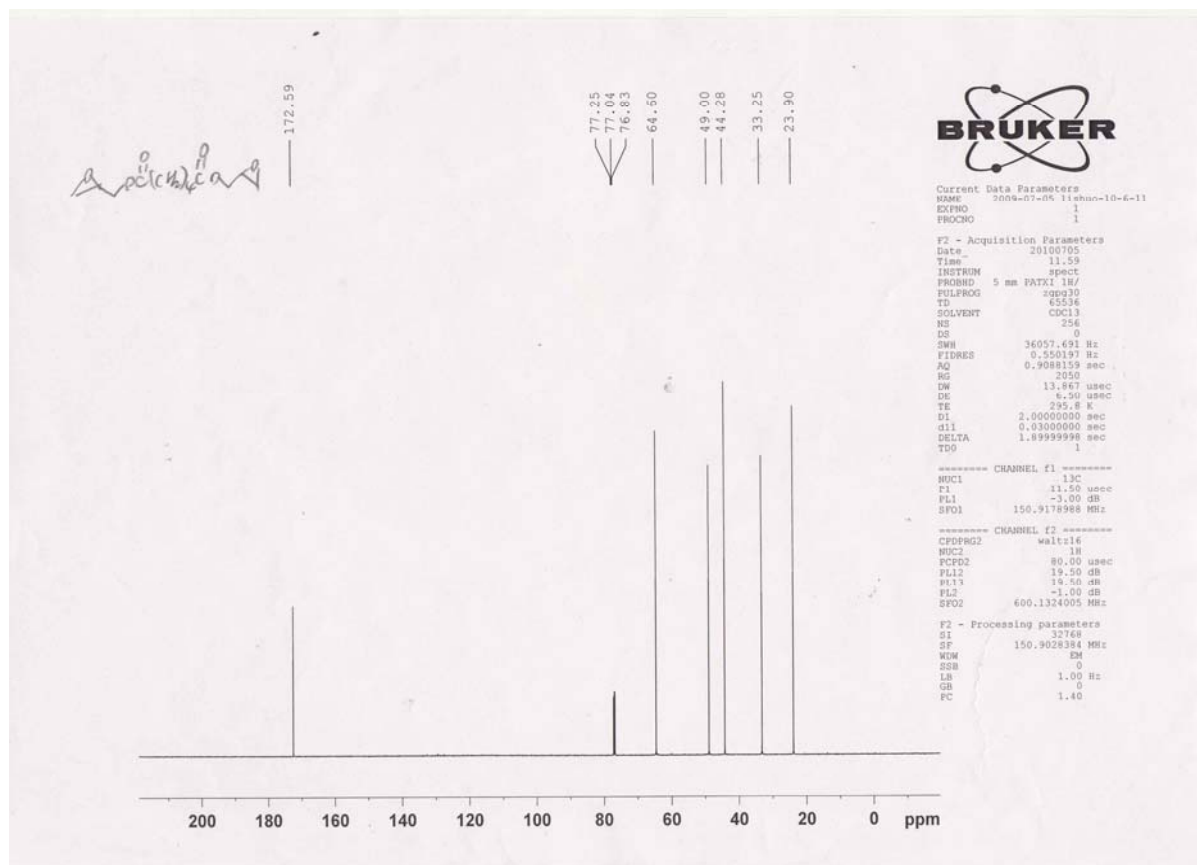

MS of **2a**

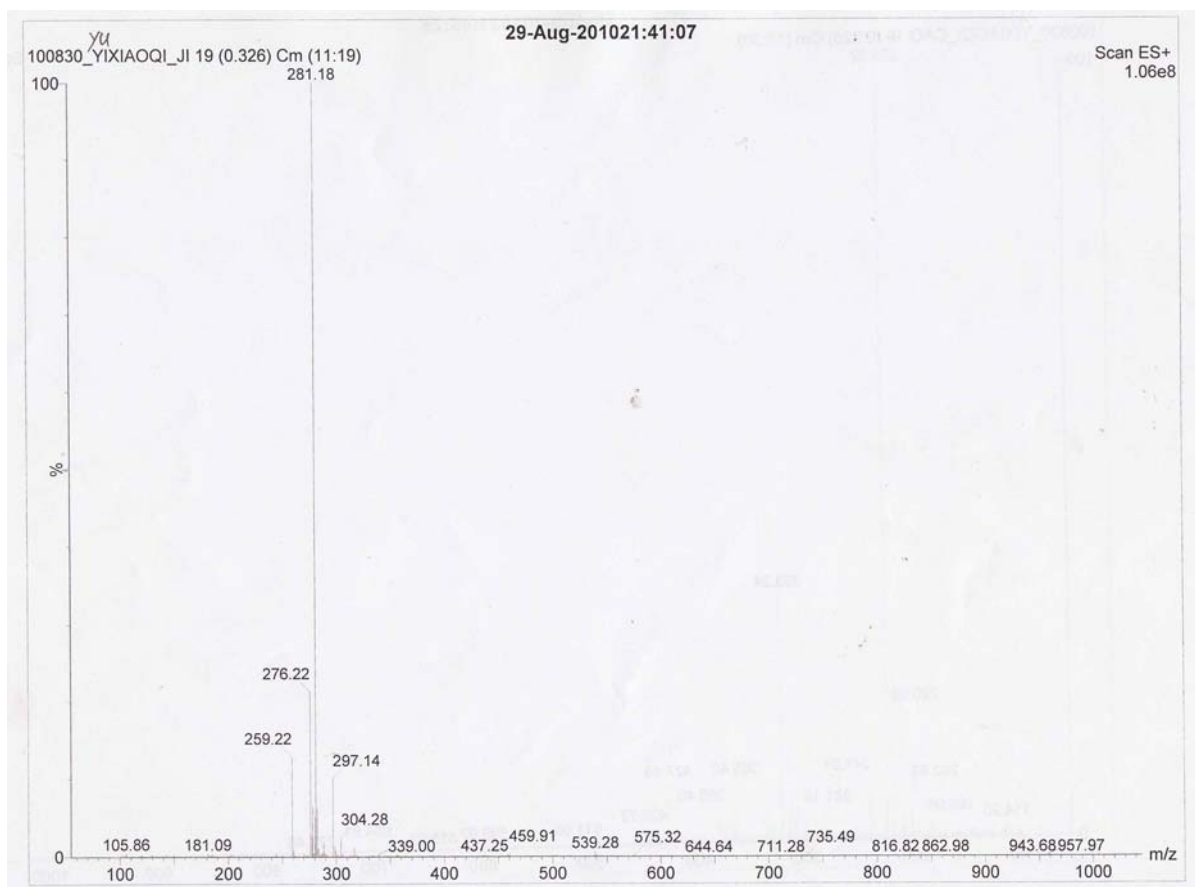

IR spectrum of **2a**

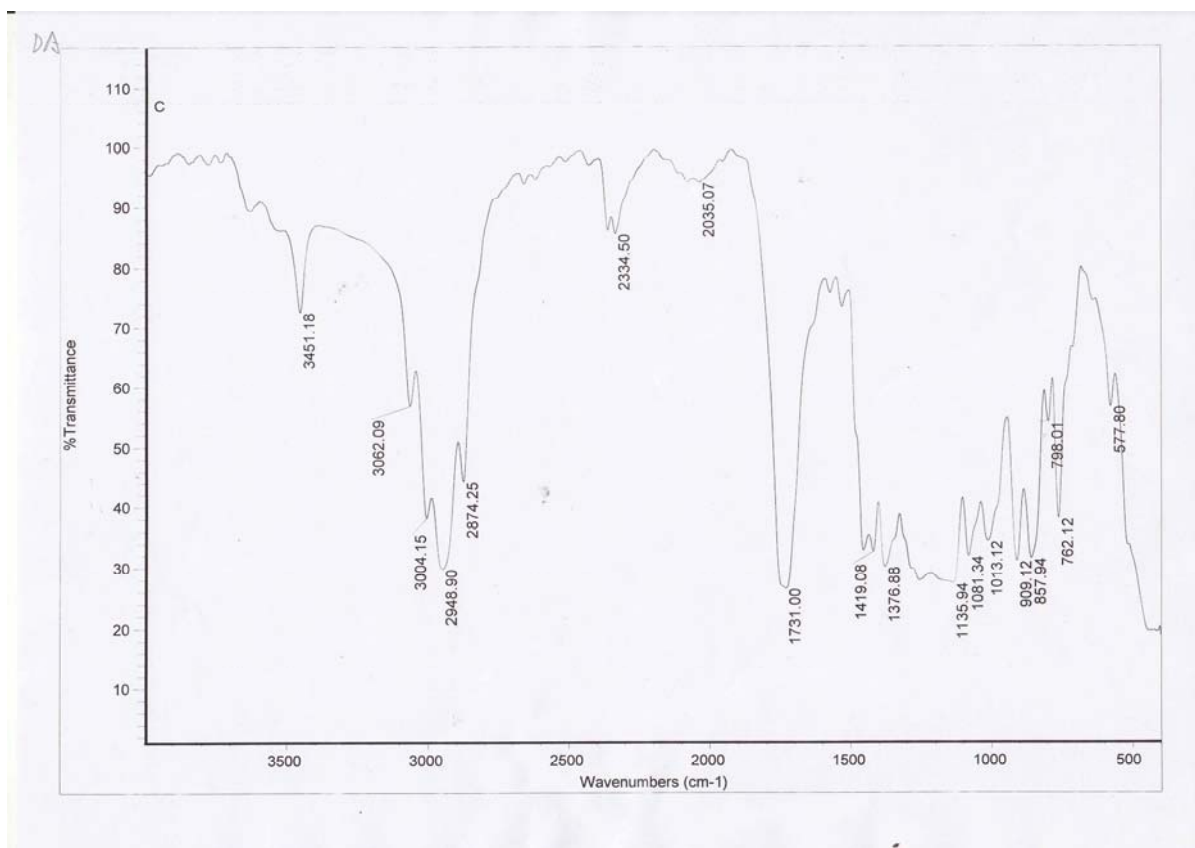

<sup>1</sup>H NMR spectrum of **2b**

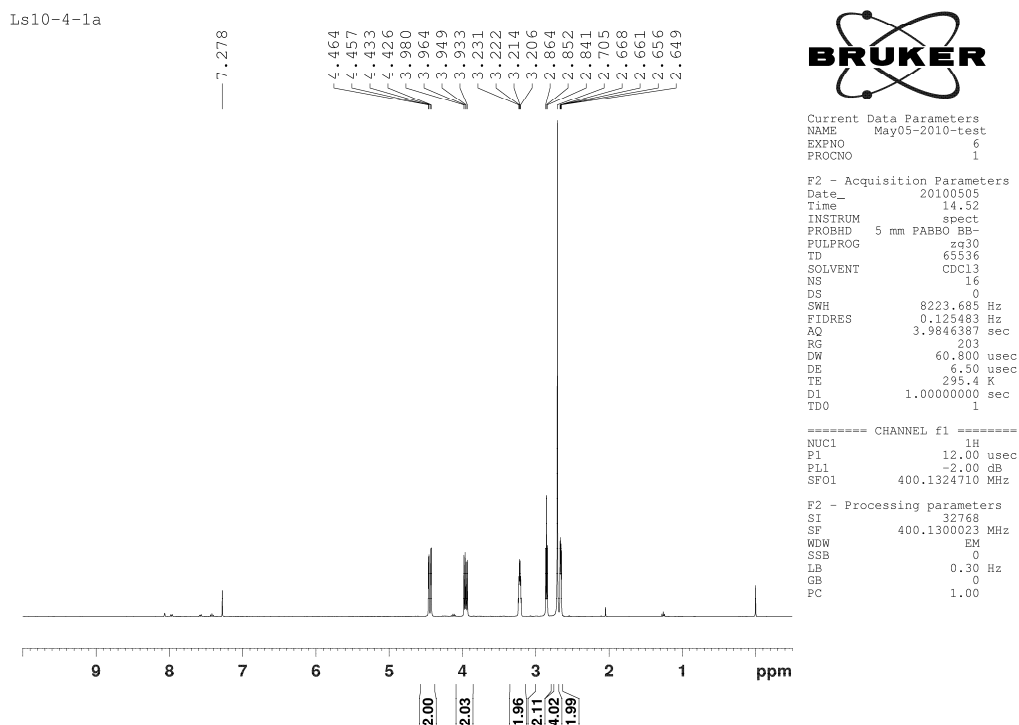

<sup>13</sup>C NMR spectrum of **2b**

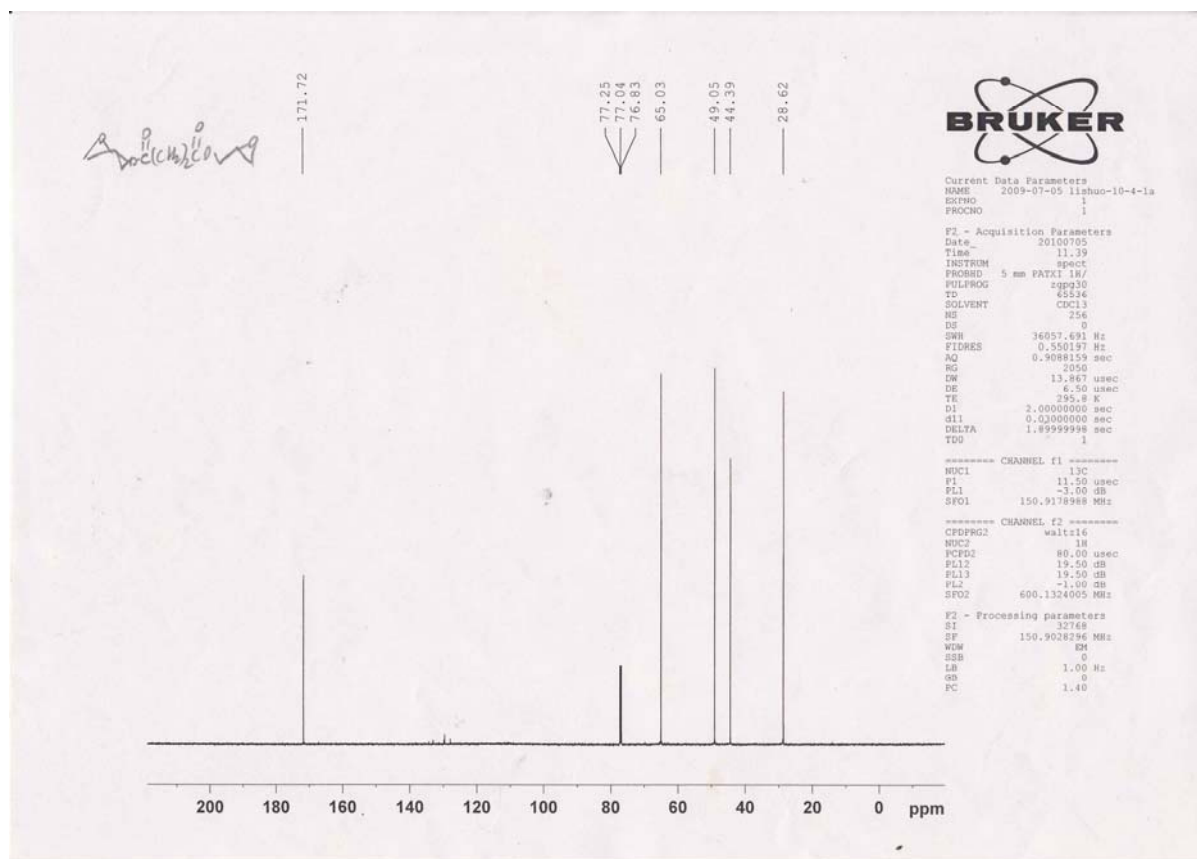

MS of **2b**

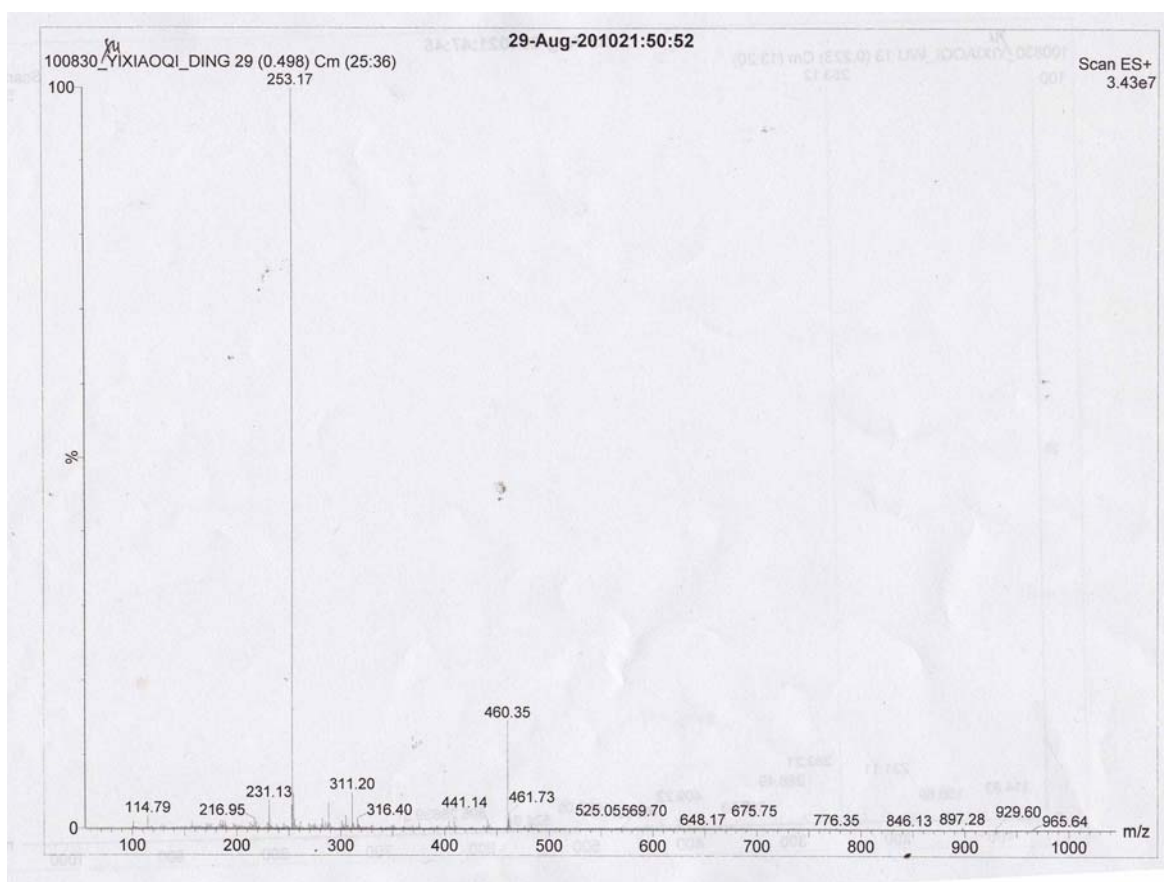

IR spectrum of **2b**

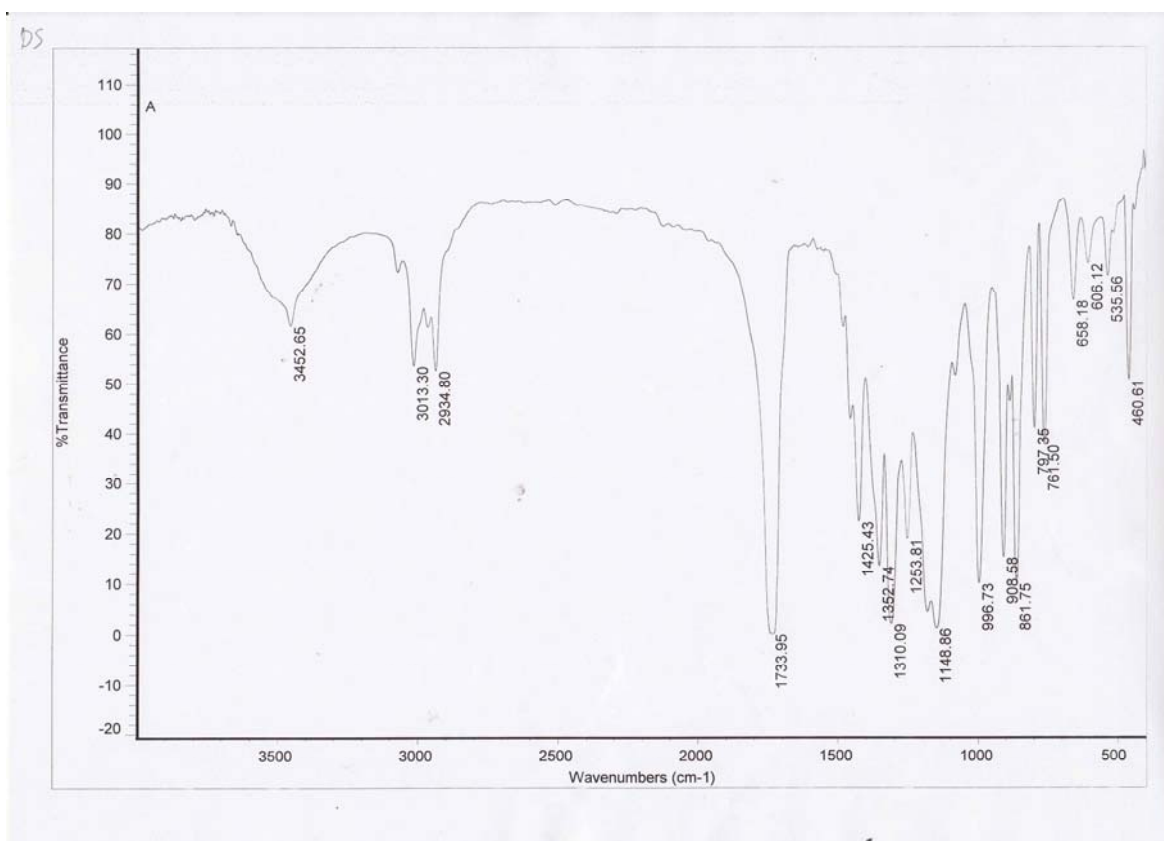



MS of **2c**

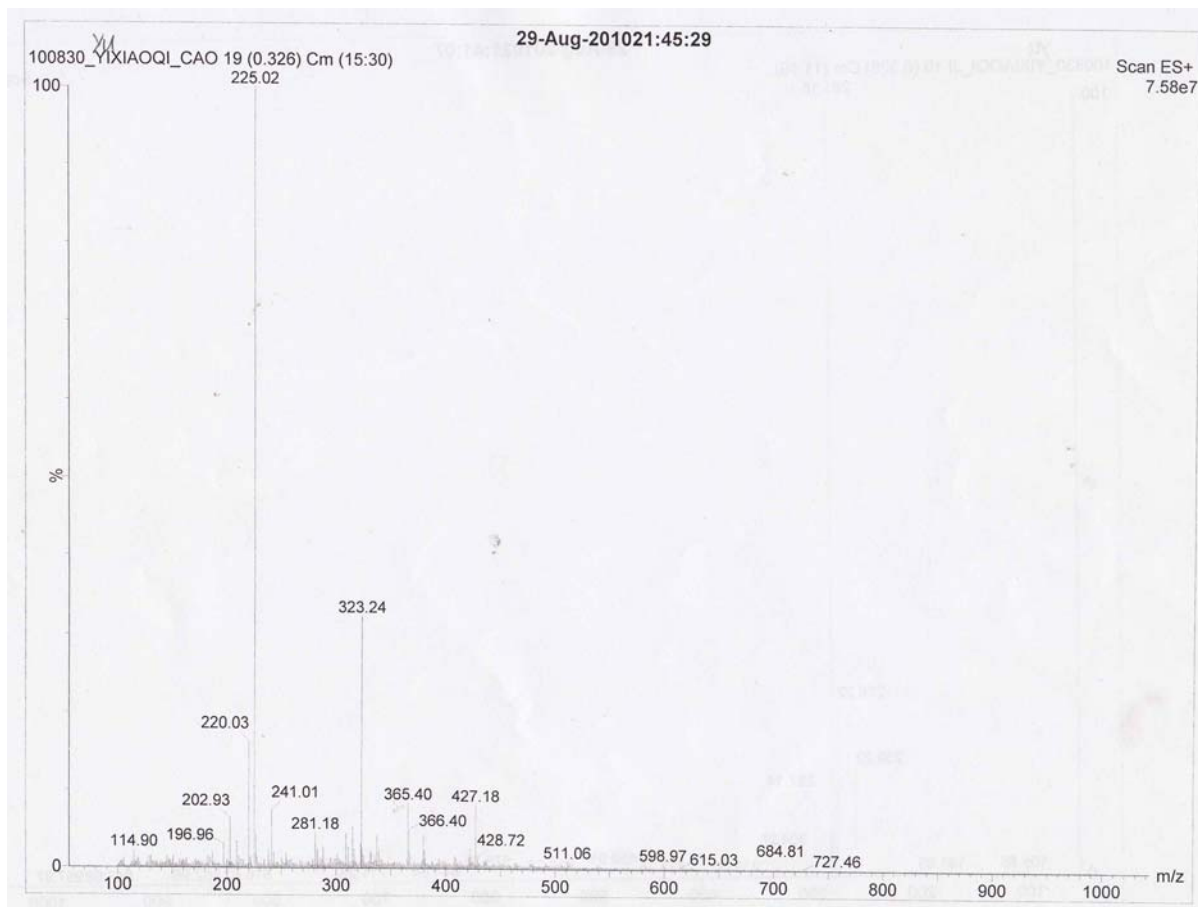

IR spectrum of **2c**

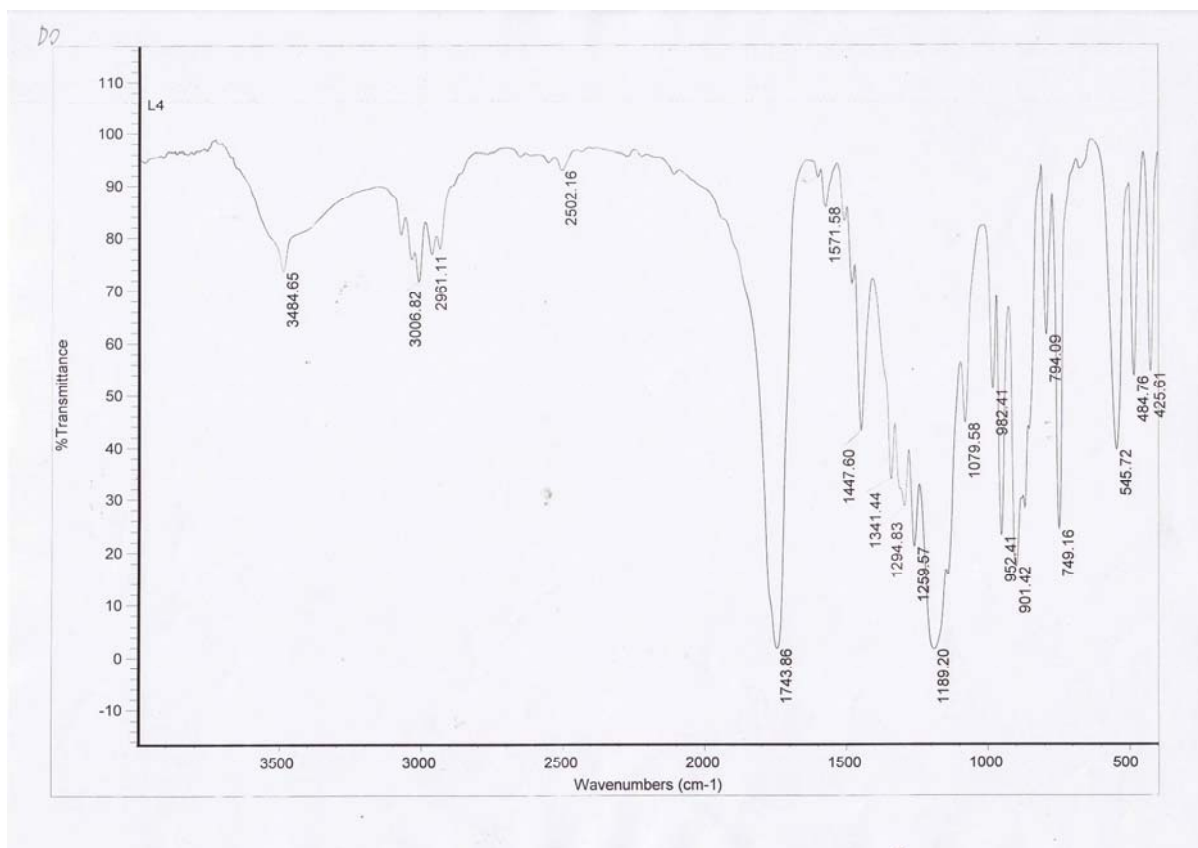

<sup>1</sup>H NMR spectrum of **3a**

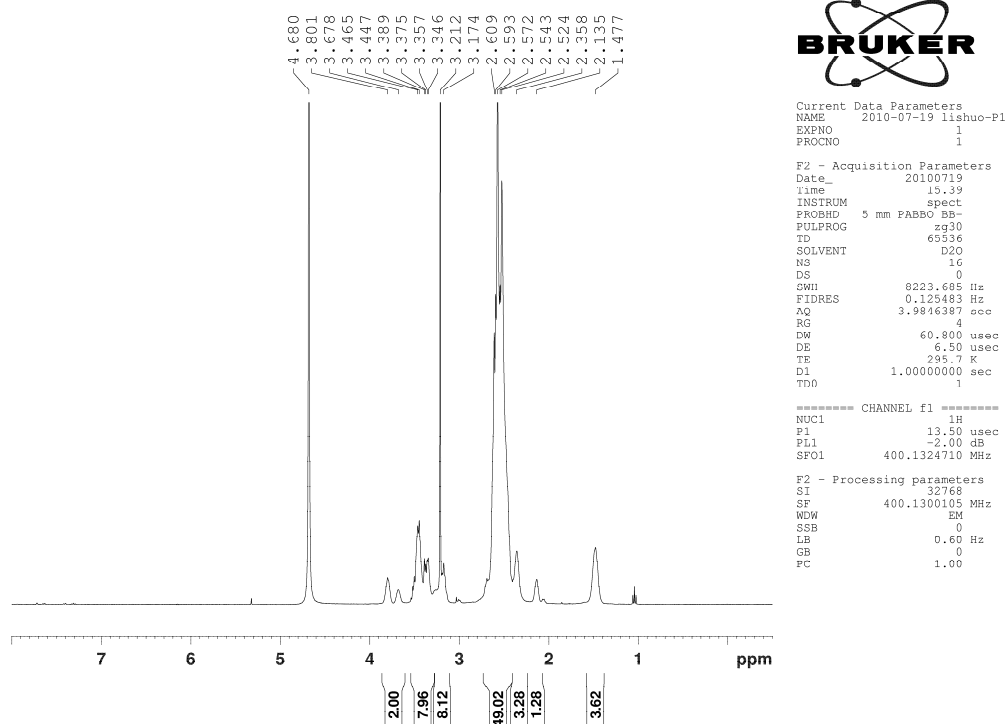

IR spectrum of **3a**

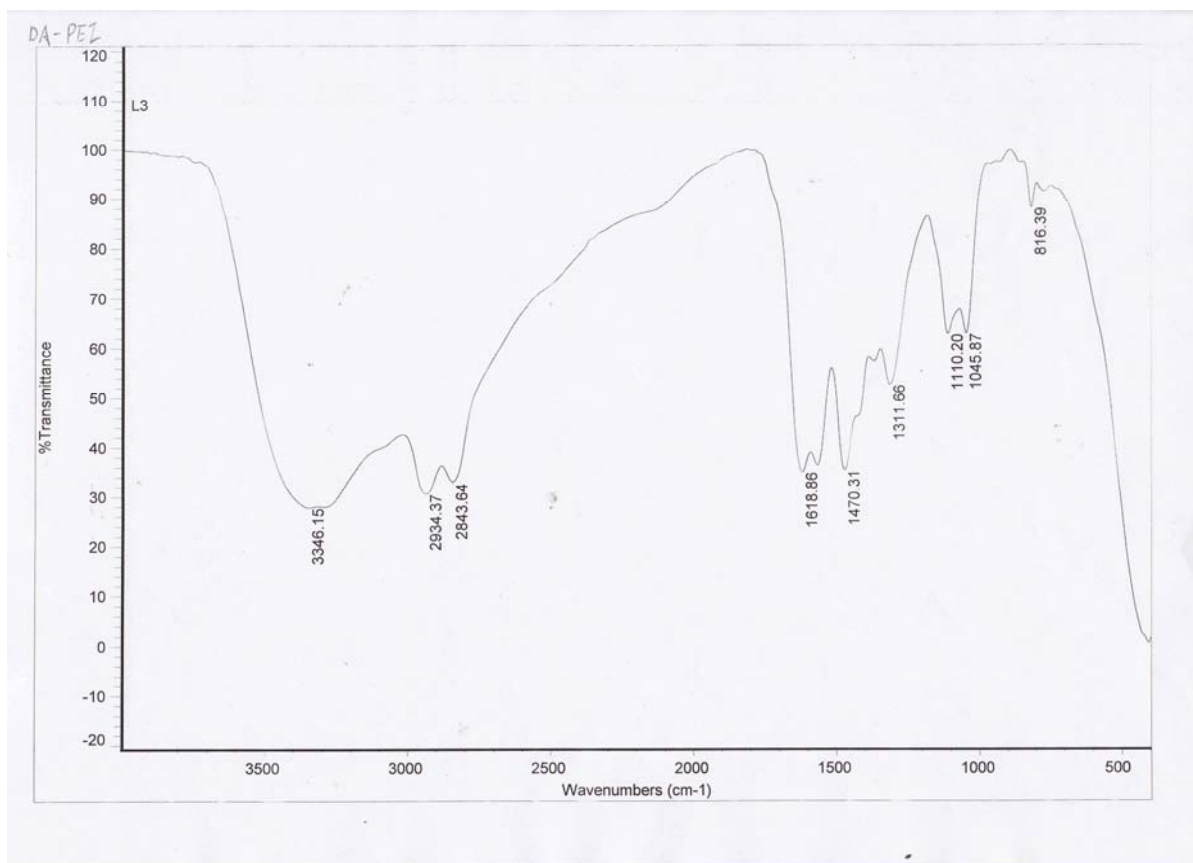



<sup>1</sup>H NMR spectrum of **3b**

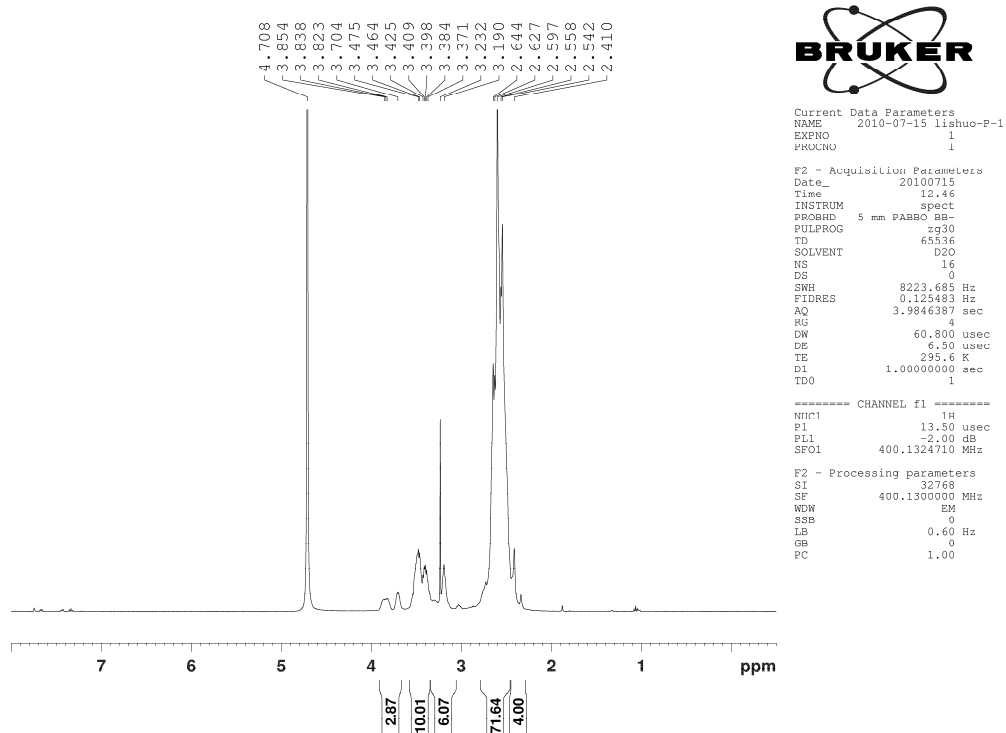

IR spectrum of **3b**

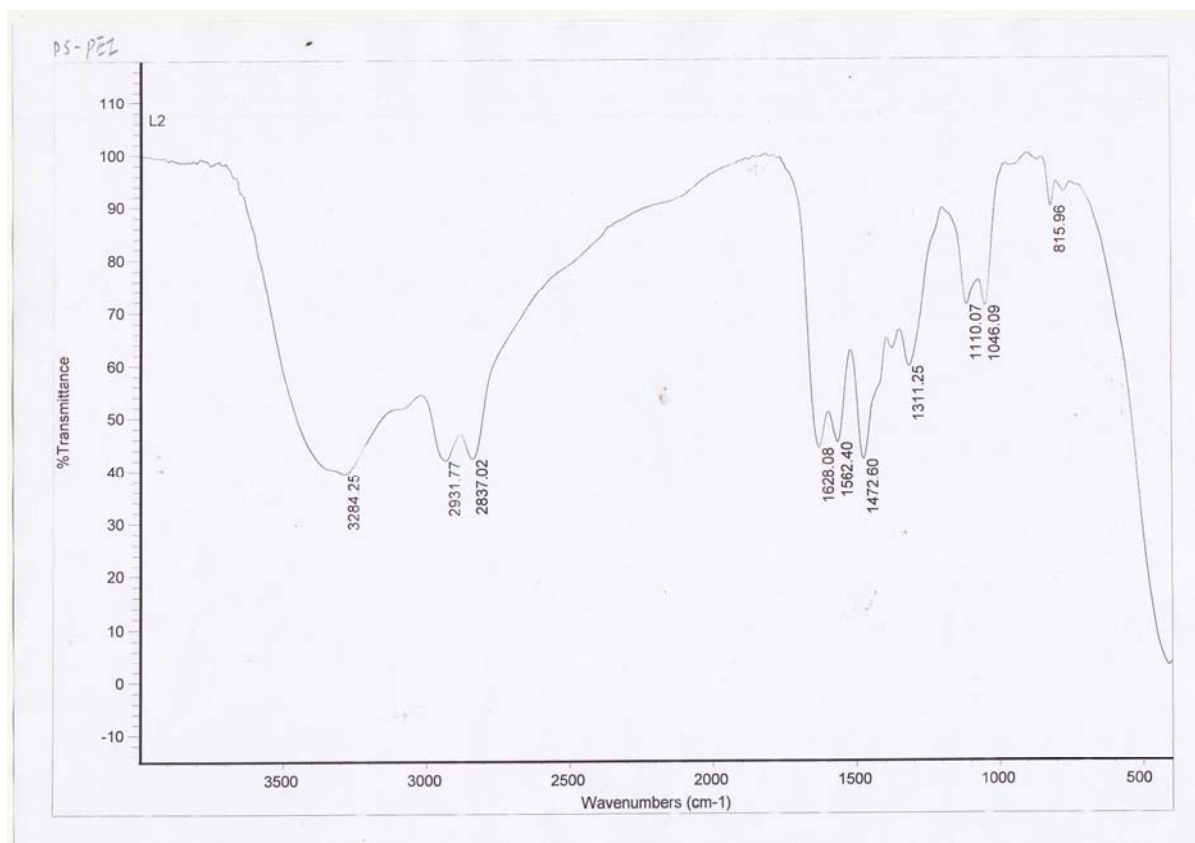

<sup>1</sup>H NMR spectrum of **3c**

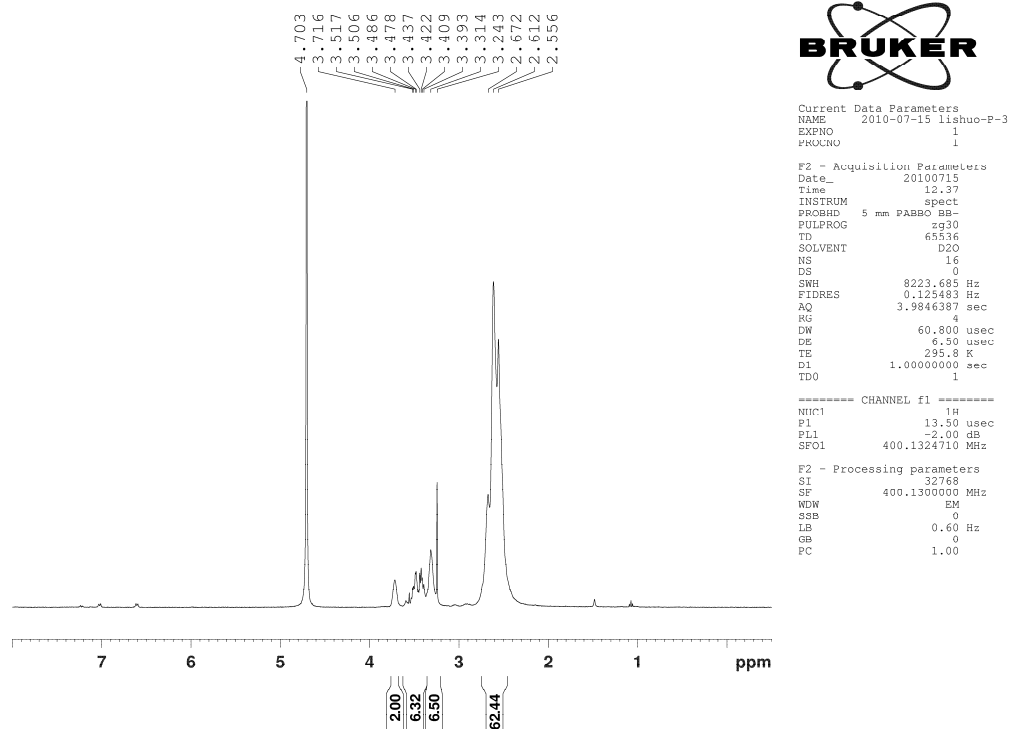

IR spectrum of **3c**

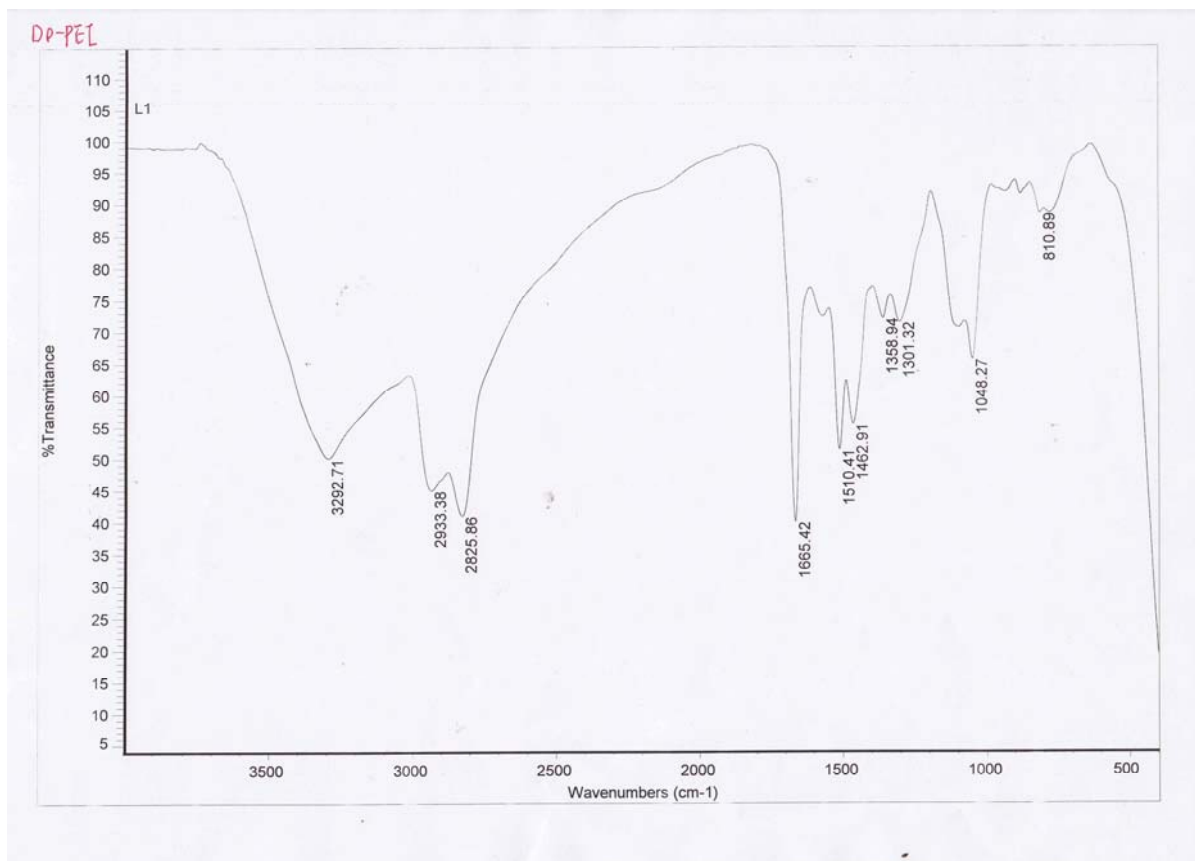

GPC of DS-PEI(6)

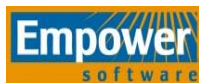

PEG

Reported by User: System

Project Name: GPC

送样单位:

检测单位: 中国科学院成都分院分析测试中心 检测人员: 龙远德 028-85223712

SAMPLE INFORMATION

|                   |               |                     |                   |
|-------------------|---------------|---------------------|-------------------|
| Sample Name:      | LS P-1A       | Acquired By:        | System            |
| Sample Type:      | Broad Unknown | Date Acquired:      | 2010-8-4 13:18:18 |
| Vial:             | 1             | Acq. Method Set:    | GPC               |
| Injection #:      | 9             | Date Processed:     | 2010-9-1 16:05:32 |
| Injection Volume: | 10.00 ul      | Processing Method:  | PEG               |
| Run Time:         | 10.0 Minutes  | Channel Name:       | Satin Ch 1        |
| Sample Set Name:  |               | Proc. Chnl. Descr.: | GPC               |

Auto-Scaled Chromatogram

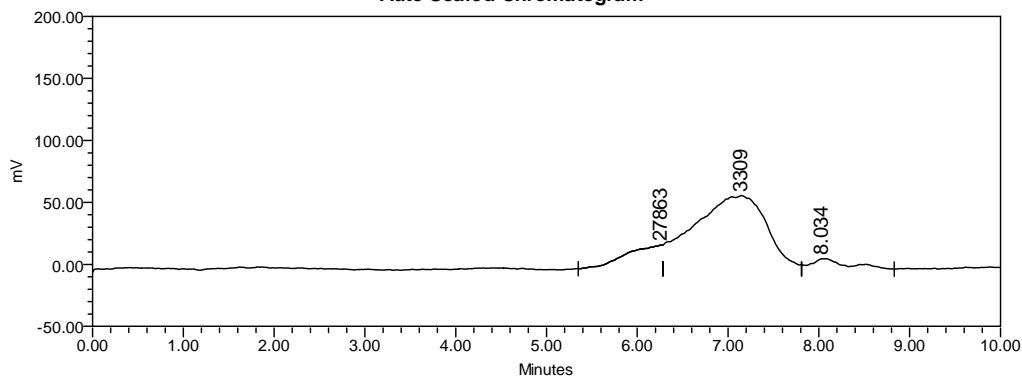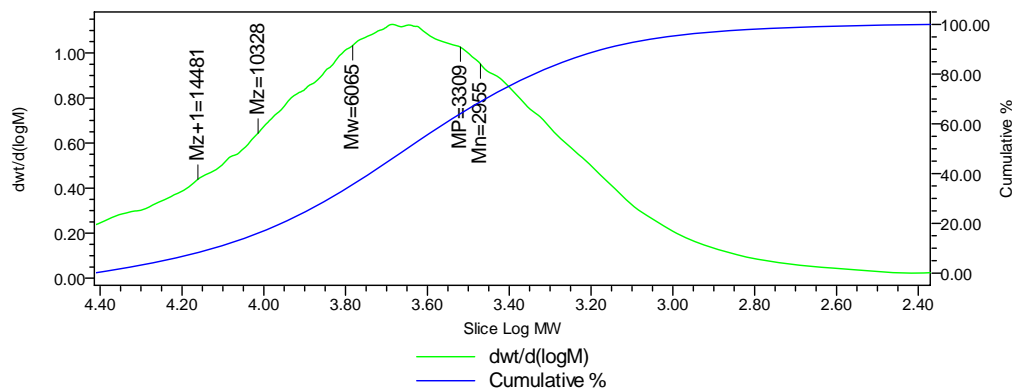

GPC Results

|   | MP<br>(Daltons) | Mw   | Mn   | Polydispersity |
|---|-----------------|------|------|----------------|
| 1 | 27863           |      |      |                |
| 2 | 3309            | 6065 | 2955 | 2.05           |
| 3 |                 |      |      |                |

Report Method: PEG

Printed 16:08:17

2010-9-1

GPC of DS-PEI(12)



PEG

Reported by User: System

Project Name: GPC

送样单位:

检测单位: 中国科学院成都分院分析测试中心 检测人员: 龙远德 028-85223712

SAMPLE INFORMATION

|                   |               |                     |                   |
|-------------------|---------------|---------------------|-------------------|
| Sample Name:      | LS P-1B       | Acquired By:        | System            |
| Sample Type:      | Broad Unknown | Date Acquired:      | 2010-8-4 12:23:12 |
| Vial:             | 1             | Acq. Method Set:    | GPC               |
| Injection #:      | 7             | Date Processed:     | 2010-9-1 16:06:32 |
| Injection Volume: | 10.00 ul      | Processing Method:  | PEG               |
| Run Time:         | 10.0 Minutes  | Channel Name:       | Satin Ch 1        |
| Sample Set Name:  |               | Proc. Chnl. Descr.: | GPC               |

Auto-Scaled Chromatogram

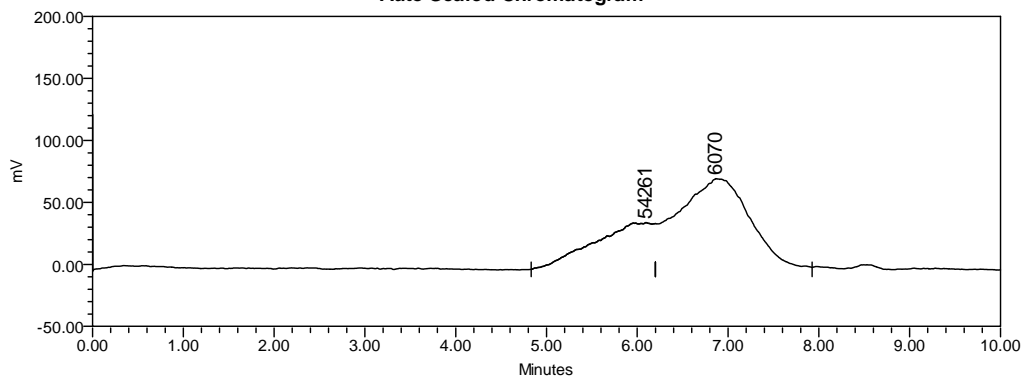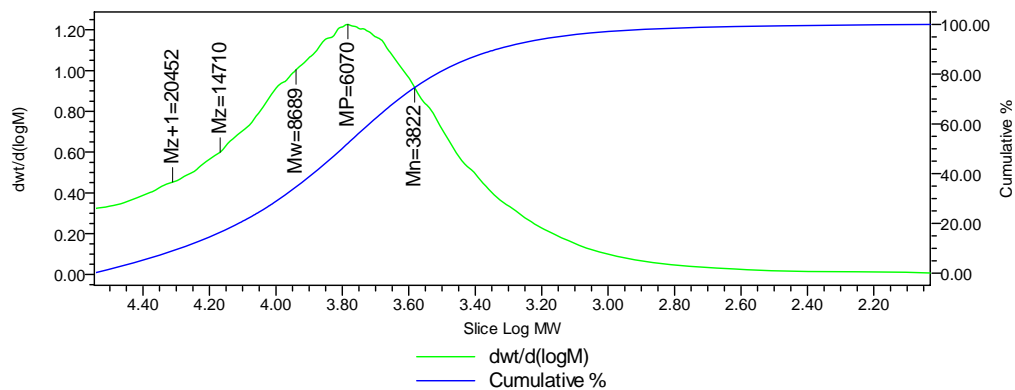

GPC Results

|   | MP<br>(Daltons) | Mw   | Mn   | Polydispersity |
|---|-----------------|------|------|----------------|
| 1 | 54261           |      |      |                |
| 2 | 6070            | 8689 | 3822 | 2.27           |

Report Method: PEG

Printed 16:07:49

2010-9-1

GPC of DS-PEI(3b)



PEG

Reported by User: System

Project Name: GPC

送样单位:

检测单位: 中国科学院成都分院分析测试中心 检测人员: 龙远德 028-85223712

SAMPLE INFORMATION

|                   |               |                     |                   |
|-------------------|---------------|---------------------|-------------------|
| Sample Name:      | LS P-1C       | Acquired By:        | System            |
| Sample Type:      | Broad Unknown | Date Acquired:      | 2010-8-4 13:29:41 |
| Vial:             | 1             | Acq. Method Set:    | GPC               |
| Injection #:      | 10            | Date Processed:     | 2010-9-1 16:09:47 |
| Injection Volume: | 10.00 ul      | Processing Method:  | PEG               |
| Run Time:         | 10.0 Minutes  | Channel Name:       | Satin Ch 1        |
| Sample Set Name:  |               | Proc. Chnl. Descr.: | GPC               |

Auto-Scaled Chromatogram

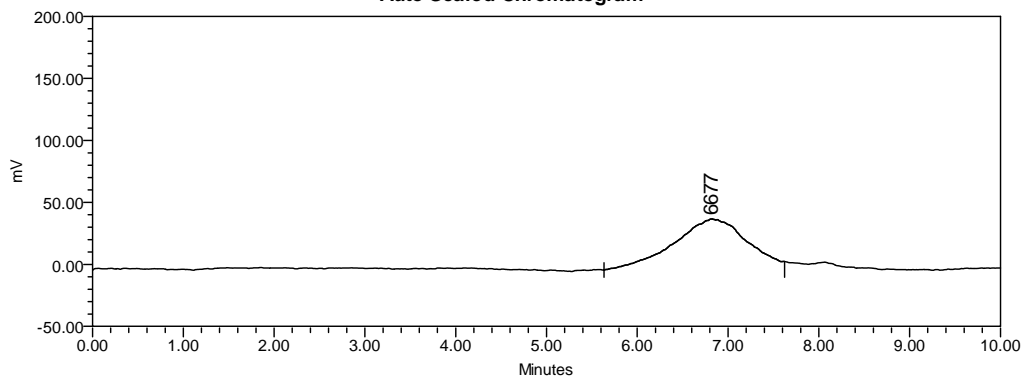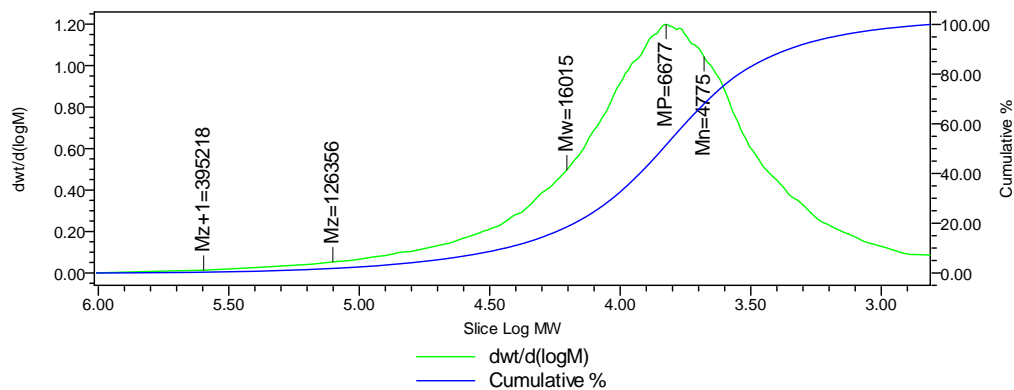

GPC Results

|   | MP<br>(Daltons) | Mw    | Mn   | Polydispersity |
|---|-----------------|-------|------|----------------|
| 1 | 6677            | 16015 | 4775 | 3.35           |

Report Method: PEG

Printed 16:10:06

2010-9-1

GPC of DS-PEI(48)



凝胶色谱

Reported by User: System

Project Name: SEC

检测单位: 中国科学院成都分院分析测试中心

分析人员: 龙远德 (028-85223712)

SAMPLE INFORMATION

|                   |               |                     |                    |
|-------------------|---------------|---------------------|--------------------|
| Sample Name:      | DZH10-3-24    | Acquired By:        | System             |
| Sample Type:      | Broad Unknown | Date Acquired:      | 2010-4-26 13:37:43 |
| Vial:             | 1             | Acq. Method Set:    | GPC                |
| Injection #:      | 16            | Date Processed:     | 2010-4-26 14:02:01 |
| Injection Volume: | 5.00 ul       | Processing Method:  | GPC                |
| Run Time:         | 11.0 Minutes  | Channel Name:       | 410                |
| Sample Set Name:  |               | Proc. Chnl. Descr.: | 410                |

Auto-Scaled Chromatogram

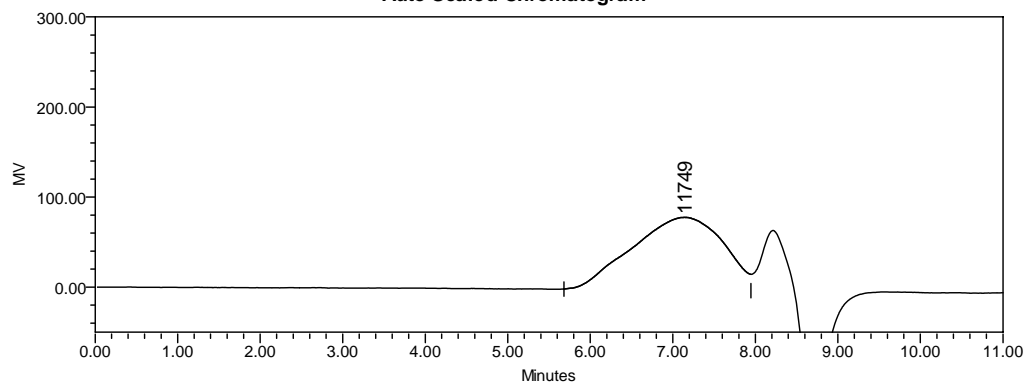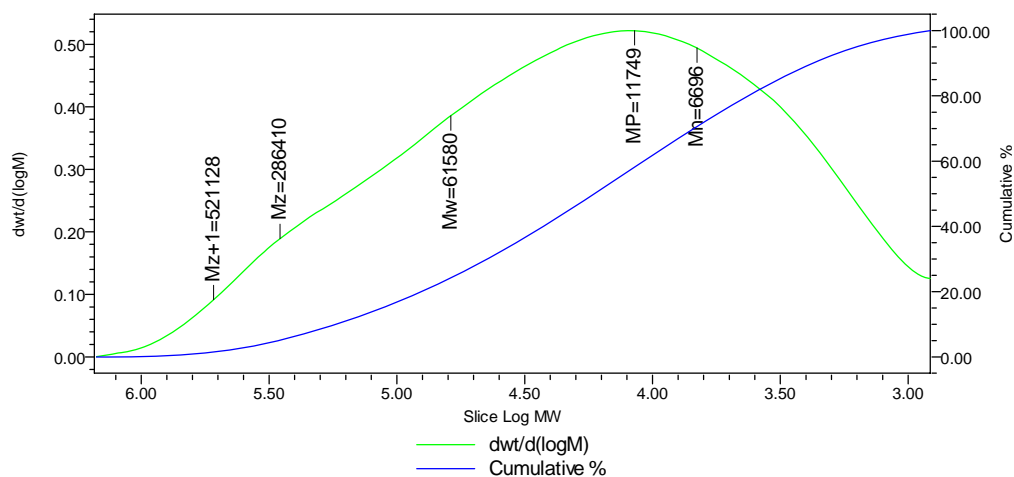

GPC Results

|   | Mw        | Mn        | Polydispersity |
|---|-----------|-----------|----------------|
| 1 | 6.16e+004 | 6.70e+003 | 9.20           |

Report Method: 凝胶色谱

Printed 14:31:39

2010-4-26

GPC of DA-PEI(3a)



PEG

Reported by User: System

Project Name: GPC

送样单位:

检测单位: 中国科学院成都分院分析测试中心 检测人员: 龙远德 028-85223712

SAMPLE INFORMATION

|                   |               |                     |                   |
|-------------------|---------------|---------------------|-------------------|
| Sample Name:      | LS P-2        | Acquired By:        | System            |
| Sample Type:      | Broad Unknown | Date Acquired:      | 2010-8-4 12:34:52 |
| Vial:             | 1             | Acq. Method Set:    | GPC               |
| Injection #:      | 8             | Date Processed:     | 2010-8-4 13:48:46 |
| Injection Volume: | 10.00 ul      | Processing Method:  | PEG               |
| Run Time:         | 10.0 Minutes  | Channel Name:       | Satin Ch 1        |
| Sample Set Name:  |               | Proc. Chnl. Descr.: | GPC               |

Auto-Scaled Chromatogram

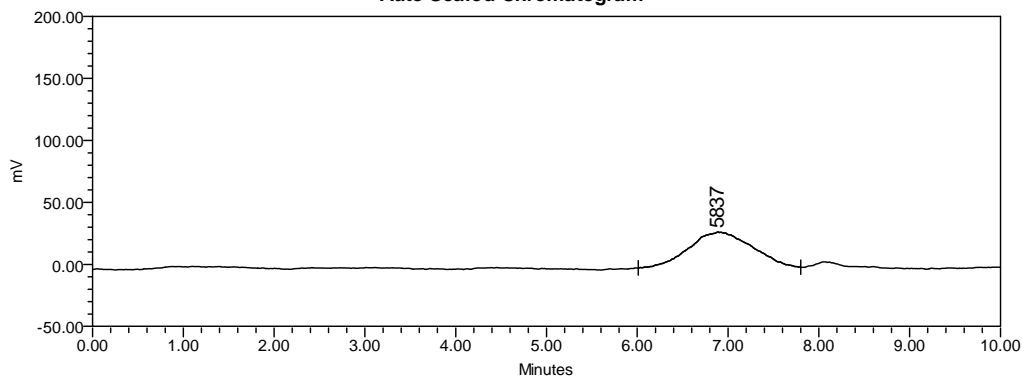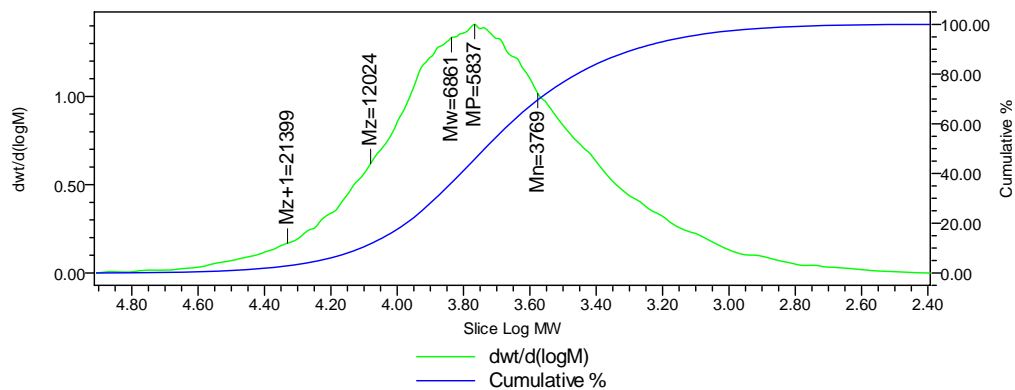

GPC Results

|   | MP<br>(Daltons) | Mw   | Mn   | Polydispersity |
|---|-----------------|------|------|----------------|
| 1 | 5837            | 6861 | 3769 | 1.82           |

Report Method: PEG

Printed 16:08:04

2010-9-1

GPC of DO-PEI(3c)



PEG

Reported by User: System

Project Name: GPC

送样单位:

检测单位: 中国科学院成都分院分析测试中心 检测人员: 龙远德 028-85223712

SAMPLE INFORMATION

|                   |               |                     |                   |
|-------------------|---------------|---------------------|-------------------|
| Sample Name:      | LS P-3        | Acquired By:        | System            |
| Sample Type:      | Broad Unknown | Date Acquired:      | 2010-8-4 12:09:35 |
| Vial:             | 1             | Acq. Method Set:    | GPC               |
| Injection #:      | 6             | Date Processed:     | 2010-9-1 16:11:11 |
| Injection Volume: | 10.00 ul      | Processing Method:  | PEG               |
| Run Time:         | 10.0 Minutes  | Channel Name:       | Satin Ch 1        |
| Sample Set Name:  |               | Proc. Chnl. Descr.: | GPC               |

Auto-Scaled Chromatogram

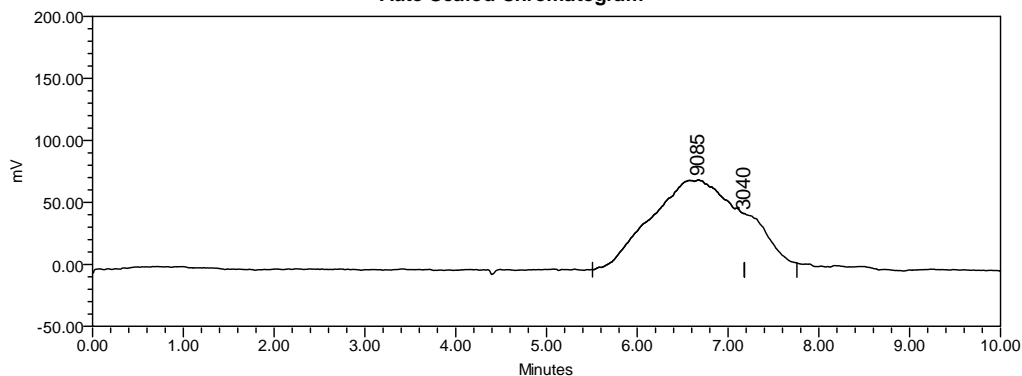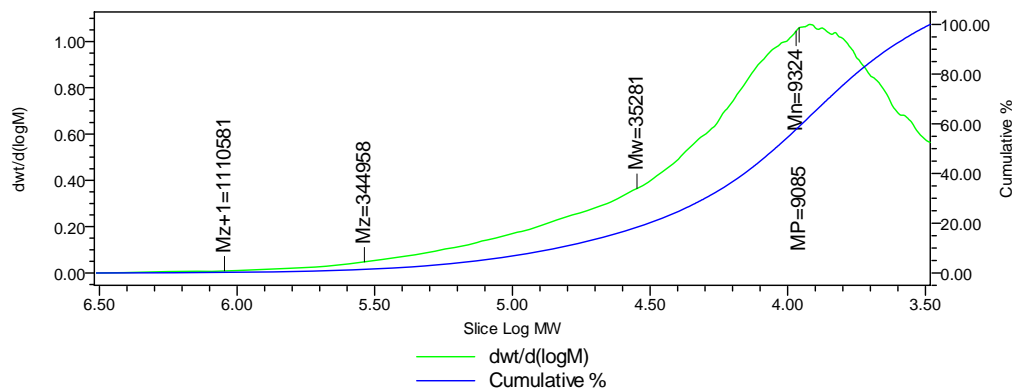

GPC Results

|   | MP<br>(Daltons) | Mw    | Mn   | Polydispersity |
|---|-----------------|-------|------|----------------|
| 1 | 9085            | 35281 | 9324 | 3.78           |
| 2 | 3040            |       |      |                |

Report Method: PEG

Printed 16:11:29

2010-9-1
